# Supplementary material for: Cocaine disrupts action flexibility via glucocorticoid receptors
Source: PubMed Central journal article supplement — iScience. 2024 May 28;27(7):110148. doi: 10.1016/j.isci.2024.110148 (PMC11233908; doi:10.1016/j.isci.2024.110148), 2024-05-28
Supplement: mmc1.pdf [file mmc1.pdf]

**iScience, Volume 27**

**Supplemental information**

**Cocaine disrupts action flexibility**

**via glucocorticoid receptors**

**Michelle K. Sequeira, Kathryn M. Stachowicz, Esther H. Seo, Sophie T. Yount, and Shannon L. Gourley**

## Supplementary Materials

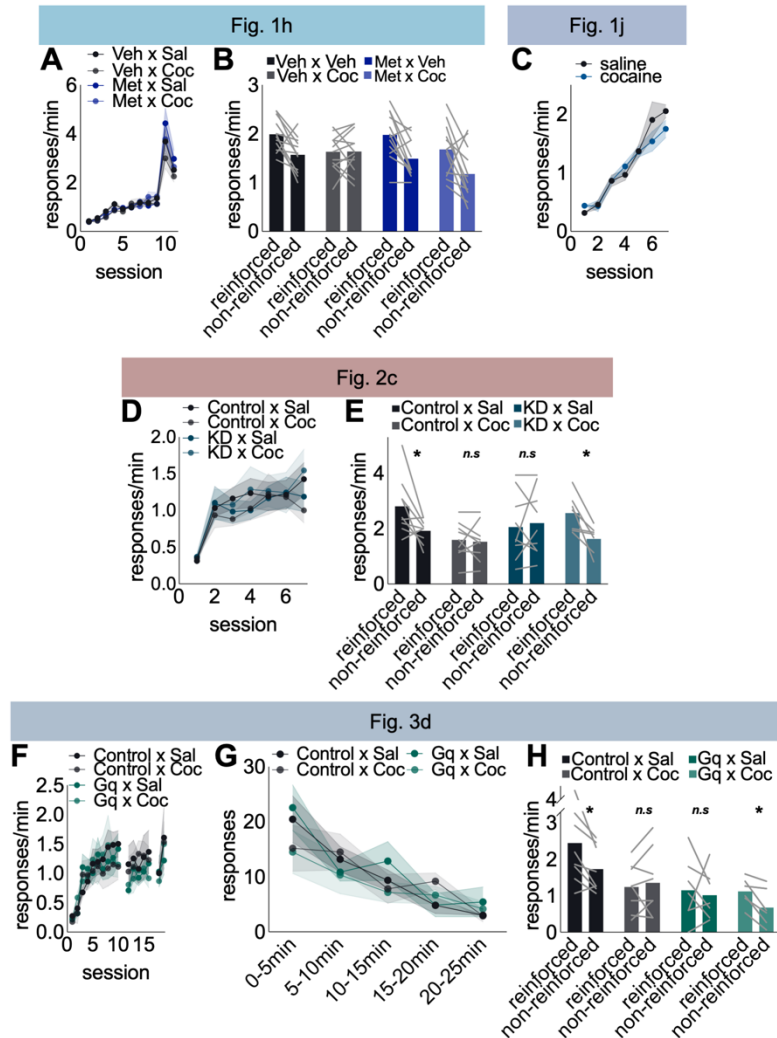

**Fig. S1. Response rates, with correspondence to the main text indicated.** (a) Mice were trained until criteria were met [main effect of session  $F_{(8,37)}=33.38$ ,  $p<0.001$ ; session x cocaine x metyrapone interaction  $F_{(8,37)}=2.00$ ,  $p=0.07$ ]. (b) Response rates at the choice test [aperture x metyrapone interaction  $F_{(1,44)}=3.86$ ,  $p=0.056$ ; aperture x cocaine x metyrapone interaction  $F_{(1,44)}=2.23$ ,  $p=0.14$ ]. (c) Mice were trained until criteria were met [main effect of session  $F_{(6,9)}=77.48$ ,  $p<0.001$ ; session x cocaine interaction  $F_{(6,9)}=0.60$ ,  $p=0.72$ ]. (d) Mice were trained until criteria were met [main effect of session  $F_{(6,25)}=13.65$ ,  $p<0.001$ ; session x cocaine x *Nr3c1* condition interaction  $F_{(6,25)}=1.12$ ,  $p=0.35$ ]. (e) Response rates at the choice test [aperture x cocaine x *Nr3c1* condition interaction  $F_{(1,30)}=5.42$ ,  $p=0.03$ ]. (f) Mice were trained until criteria were met (session 1-10). There were no differences between the groups [main effect of session  $F_{(9,18)}=4.09$ ,  $p=0.005$ ; session x cocaine x DREADD interaction  $F_{(9,18)}=0.78$ ,  $p=0.64$ ]. Mice were

placed back into the operant chambers to reignite responding after cocaine exposure and trained until criteria were met (session 11-15). There were no differences between the groups [main effect of session  $F_{(4,23)}=3.84$ ,  $p=0.02$ ; session x cocaine x DREADD interaction  $F_{(4,23)}=0.53$ ,  $p=0.71$ ]. Responding was once again reignited after the test for response flexibility (session 16-17). There were no differences between the groups [main effect of session  $F_{(1,26)}=11.62$ ,  $p=0.002$ ; session x cocaine x DREADD interaction  $F_{(1,26)}=0.85$ ,  $p=0.37$ ]. (g) All mice decreased responding across the non-reinforced session [main effect of time  $F_{(4,120)}=20.71$ ,  $p<0.001$ ; time x cocaine x DREADD interaction  $F_{(4,120)}=0.05$ ,  $p=1.0$ ]. (h) Response rates at the choice test [aperture x cocaine x DREADD interaction  $F_{(1,25)}=4.67$ ,  $p=0.04$ ]. \* $p<0.05$ . Means ( $\pm$ SEMs if indicated) + connected grey lines representing individual mice.

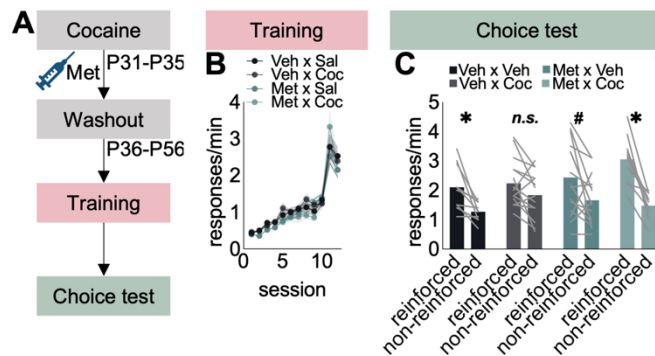

**Fig. S2. Inhibiting CORT synthesis in mice exposed to cocaine in adolescence protects flexible behavior (associated with main text Fig. 1).** (a) Experimental timeline. “P” refers to postnatal day. (b) Mice were trained to respond for food. Response rates in training [main effect of cocaine  $F_{(1,46)}=0.001$ ,  $p=0.97$ ; main effect of metyrapone  $F_{(1,46)}=2.33$ ,  $p=0.13$ ; main effect of session  $F_{(9,414)}=56.08$ ,  $p<0.001$ , session x cocaine x metyrapone interaction effect  $F_{(9,414)}=2.95$ ,  $p=0.002$ ]. The Met x Sal group responded more during session 9 and the Coc x Sal group responded more during sessions 5 and 9. There were no differences between the groups by the end of training. (c) Adolescent cocaine exposure impaired action flexibility, but blocking CORT synthesis protected action flexibility in cocaine-exposed mice [aperture x cocaine x metyrapone interaction effect  $F_{(1,46)}=4.13$ ,  $p=0.048$ ].  $n=10-15$  mice/group, \* $p<0.05$ , # $p=0.07$ . Bars and connected dots represent means (+SEMs if indicated), and gray lines represent individual mice.

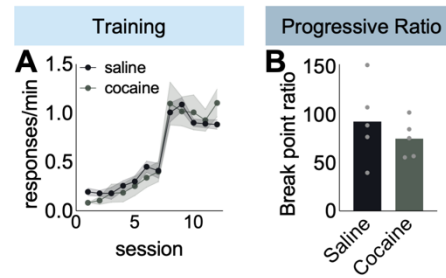

**Fig. S3. Cocaine does not obviously impact motivation to respond for food pellets (associated with main text Fig. 1).** (a) Mice were trained to respond for food at one aperture. Response rates in training [main effect of cocaine  $F_{(1,8)}=0.002$ ,  $p=0.970$ ; main effect of session  $F_{(11,88)}=54.08$ ,  $p<0.001$ ; session x cocaine interaction effect  $F_{(11,88)}=0.895$ ,  $p=0.549$ ]. (b) Following training, they were tested on a progressive ratio schedule of reinforcement. Break point ratios did not differ between groups [ $t_8=0.876$ ,  $p=0.407$ ].  $n=5$  mice/group. Bars and connected dots represent means ( $\pm$ SEMs if indicated), and unconnected dots represent individual mice.

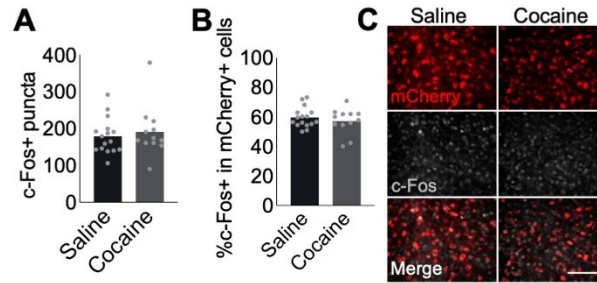

**Fig. S4. Cocaine does not impact immediate-early gene levels in memory trace neurons at the choice test (associated with main text Fig. 3).** (a) Cocaine does not impact c-Fos counts in the VLO [ $t_{(26)}=0.54$ ,  $p=0.59$ ], measured following the choice test. (b) c-Fos co-localization with mCherry-expressing cells (*i.e.*, memory trace cells) is also not impacted by cocaine [ $t_{(26)}=0.84$ ,  $p=0.41$ ]. (c) Representative mCherry and c-Fos. Scale bar=50 $\mu$ m.  $n=12-16$  sections/group. Means + grey dots indicating individual data points.
